# Supplementary material for: miR-154-5p Functions as an Important Regulator of Angiotensin II-Mediated Heart Remodeling
Source: Hindawi journal article supplement (doi:10.1155/2019/8768164), 2019-09-12
Supplement: f1 [file 8768164.f1.pdf]

# Supplemental figure. 1

**A**

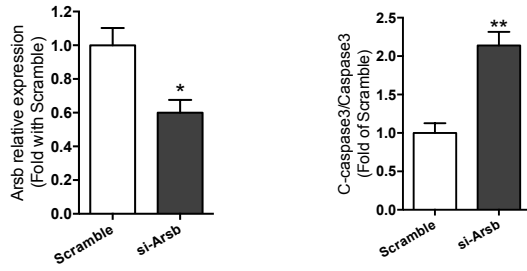

**B**

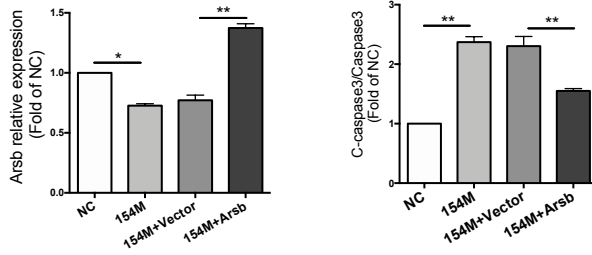

**C**

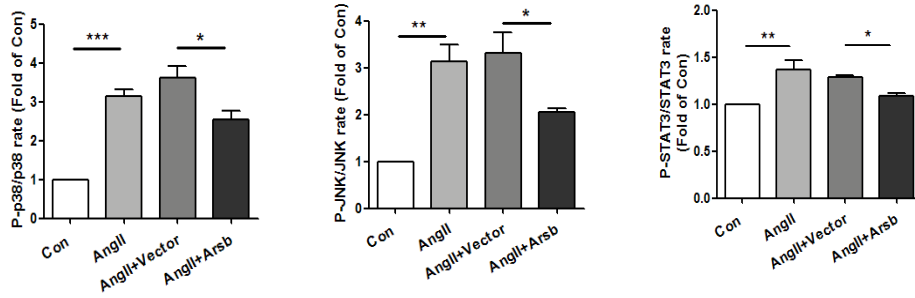

**D**

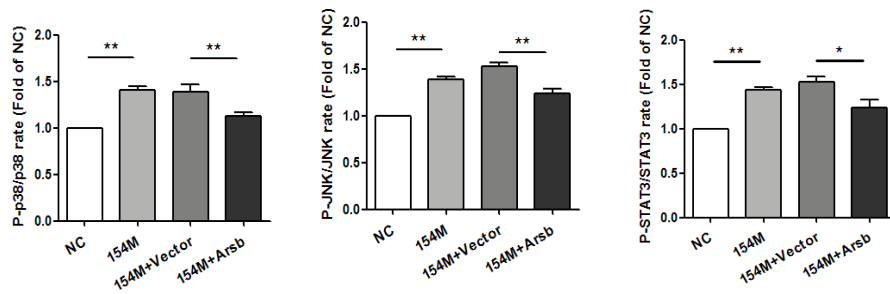

**Supplemental Table.1**

| Candidate gene name | Original sequence                      | Mutated sequences                      |
|---------------------|----------------------------------------|----------------------------------------|
| Arsb                | ...AAAAGUAAAAGCUUGAU <u>AACCUA</u> ... | ...AAAAGUAAAAGCUUG <u>CGCCAAGA</u> ... |
| Kcna2               | ...UUUAAAACACAGGAGAU <u>AACCUA</u> ... | ...UUUAAAACACAGGAG <u>CGCCAAGA</u> ... |
| IL-6                | ...UAUAGUUUUGAAAUGAU <u>AACCUA</u> ... | ...UAUAGUUUUGAAAUG <u>CGCCAAGA</u> ... |
| Dnm1l               | ...CUAAAUGAUCCAUGAU <u>AACCUA</u> ...  | ...CUAAAUGAUCCAUG <u>CGCCAAGA</u> ...  |
| Camk4               | ...AGAUGGUUAUAAAAGAU <u>AACCUG</u> ... | ...AGAUGGUUAUAAAAG <u>CGCCAAGG</u> ... |
| Plekha1             | ...CCUUGUCAUCAGUAGUA <u>ACCUAU</u> ... | ...CCUUGUCAUCAGUAG <u>GCCAAGAU</u> ... |
| Apln                | ...CCCCAAGCCCCAU <u>AUAACCUG</u> ...   | ...CCCCAAGCCCCAU <u>CGCCAAGG</u> ...   |
| Rps6ka5             | ...ACAGUUGUGUAAUGAU <u>AACCUA</u> ...  | ...ACAGUUGUGUAAUG <u>CGCCAAGC</u> ...  |
| Cops8               | ...AUUUUAUACACGCUU <u>AUAACCUG</u> ... | ...AUUUUAUACACGCUU <u>CGCCAAGG</u> ... |
| Psmf1               | ...AAUAAUAGCACUUU <u>AUAACCUG</u> ...  | ...AAUAAUAGCACUUU <u>CGCCAAGG</u> ...  |
| Id2                 | ...UGUAUAGUGGCAGAA <u>UAACCUA</u> ...  | ...UGUAUAGUGGCAGAA <u>CGCCAAGA</u> ... |
| Mmp20               | ...ACAGAUCCAGGAAAA <u>UAACCUA</u> ...  | ...ACAGAUCCAGGAAA <u>CGCCAAGA</u> ...  |
| Nphs2               | ...AGACAUGCCCACAGGAU <u>AACCUA</u> ... | ...AGACAUGCCCACAGG <u>CGCCAAGA</u> ... |
| Dpp8                | ...AAUAAUUUUUCAAGGAU <u>AACCUA</u> ... | ...AAUAAUUUUUCAAGG <u>CGCCAAGA</u> ... |
| Prr11               | ...GUUAAUUGAGAUGGGAU <u>AACCUA</u> ... | ...GUUAAUUGAGAUGGG <u>CGCCAAGA</u> ... |
| Bach1               | ...CCUCGUGGGCCGUGGAU <u>AACCUA</u> ... | ...CCUCGUGGGCCGUGG <u>CGCCAAGA</u> ... |
